1 **For *Biological Conservation***

2

## 3 **The role of elections as drivers of tropical deforestation**

4

### 5 **Authors**

6 Joeri Morpurgo\*<sup>1</sup>, W. Daniel Kissling<sup>1</sup>, Peter Tyrrell<sup>2, 3, 4</sup>, Pablo J. Negret<sup>5, 6</sup>, James R. Allan<sup>1</sup>

7

### 8 **Affiliations**

9 <sup>1</sup> Institute for Biodiversity and Ecosystem Dynamics (IBED), University of Amsterdam, P.O. Box 94240,  
10 1090 GE, Amsterdam, The Netherlands

11 <sup>2</sup> South Rift Association of Landowners, P.O. Box 15289, Nairobi 00509, Kenya

12 <sup>3</sup> Department of Geography and Environmental Studies, University of Nairobi, Nairobi, Kenya

13 <sup>4</sup> Wildlife Conservation Research Unit, Oxford University

14 <sup>5</sup> The University of Queensland, School of Earth and Environmental Sciences, Qld 4072, Australia

15 <sup>6</sup> Centre for Biodiversity and Conservation Science, University of Queensland, Brisbane, QLD 4072,  
16 Australia.

17

18 \* Correspondence to: Joeri Morpurgo. E-mail: [joeri.morpurgo@gmail.com](mailto:joeri.morpurgo@gmail.com). Postal address:  
19 Environmental Biology Department, Institute of Environmental Sciences, CML, Leiden University,  
20 Leiden, The Netherlands. Phone number: +31681075924

21

22 *Abstract*

23 Tropical forests support immense biodiversity and provide essential ecosystem services for billions of  
24 people. Despite this value, tropical deforestation continues at a high rate. Emerging evidence  
25 suggests that elections can play an important role in shaping deforestation, for instance by  
26 incentivising politicians to allow increased utilisation of tropical forests in return for political support  
27 and votes. Nevertheless, the role of elections as a driver of deforestation has not been  
28 comprehensively tested at broad geographic scales. Here, we created an annual database from 2001  
29 to 2018 on political elections and forest loss for 55 tropical nations and modelled the effect of  
30 elections on deforestation. In total, 1.5 million km<sup>2</sup> of forest was lost during this time period, and the  
31 rate of deforestation increased in 37 (67%) of the analysed countries. Deforestation was significantly  
32 lower in years with presidential or lower chamber elections compared to non-election years, which is  
33 in contrast to previous local-scale studies. Moreover, deforestation was significantly higher in  
34 presidential or lower chamber elections that are competitive (i.e. when the opposition can  
35 participate in elections and has a legitimate chance to gain governmental power) compared to  
36 uncompetitive elections. Our results document a pervasive loss of tropical forests and suggest that  
37 competitive elections are potential drivers of deforestation. We recommend that organisations  
38 monitoring election transparency and fairness should also monitor environmental impacts such as  
39 forest loss, habitat destruction and resource exploitation. This would benefit the tracking of potential  
40 illegal vote buying with natural resources.

41

42 **Keywords:** biodiversity threat, forest loss, governance, habitat loss, policy, democracy

43

44

45

46

47

48

49

50

51

52

53 **1. Introduction**

54 Tropical forests contain Earth's richest biota and are the last refuges for many imperilled species  
55 (Gaston, 2000; Gibson et al., 2011). Tropical forests also provide globally important ecosystem  
56 services such as carbon sequestration and clean water provisioning (Foley et al., 2007). As many as  
57 1.6 billion rural people live in close proximity to forests and may depend on forest resources for their  
58 livelihoods (Angelsen et al., 2014; Joshi and Joshi, 2019; Rudow et al., 2013). It is therefore  
59 concerning that tropical deforestation has reached critically high levels in the last few decades, with  
60 as much as 79,000 km<sup>2</sup> – an area similar in size to Austria – being cleared every year (Austin et al.,  
61 2017). Understanding what drives tropical deforestation is thus crucial for implementing policy and  
62 conservation actions to ensure forest preservation.

63 The most prevalent direct causes of tropical deforestation include commercial logging (Curtis  
64 et al., 2018; Hosonuma et al., 2012), subsistence logging (e.g. for firewood; Heltberg et al., 2000;  
65 Hosonuma et al., 2012), conversion of forests to agricultural lands (e.g. for oil palm plantations or  
66 cropping; Hosonuma et al., 2012; Koh and Wilcove, 2008; Laurance et al., 2014), and wildfires which  
67 are often started by subsistence slash and burn agriculture (Laurance et al., 2002). There is good  
68 evidence that these drivers of deforestation increase when certain enabling factors are at play. One  
69 of these factors is corruption, which has been associated with higher rates of deforestation (Burgess  
70 et al., 2012; Smith et al., 2003; Wright et al., 2007). Another factor is the Gross Domestic Product  
71 (GDP) of a country, with higher deforestation occurring in countries with lower GDP (Ewers, 2006).  
72 Deforestation also tends to be higher in countries with higher human population densities (Sandker  
73 et al., 2017). Interestingly, factors such as a free media are associated with less deforestation,  
74 perhaps countering the effects of corruption (Bertot et al., 2010; Kolstad and Wiig, 2009). Other  
75 factors that potentially influence deforestation (e.g. armed conflicts, illegal crop production, or  
76 political elections and election cycles) have been less studied, even though there is growing evidence  
77 that they could drive deforestation trends in the tropics (Dávalos et al., 2016; Landholm et al., 2019;  
78 Negret et al., 2019).

79 Recent evidence suggests that elections could be key drivers of deforestation (List and Sturm,  
80 2006; Pailler, 2018; Rodrigues-Filho et al., 2015). For example, a local scale study in Brazil found that  
81 municipal level deforestation was 8–10% higher in years when there was a municipal election  
82 (Pailler, 2018). Moreover, a similar increase in deforestation was also found during the national  
83 elections in Brazil (Rodrigues-Filho et al., 2015). During gubernational elections, in the United States  
84 of America, governors are more likely to advance or retract environmental policy based on the  
85 preference of the voters of their state. For instance, in “green” states environmental policy is more

86 likely to advance during the election period, whereas in “brown” states it is more likely to retract  
87 (List and Sturm, 2006). A recent study investigating the economic and political incentives of  
88 deforestation in Indonesia found that deforestation substantially increases before a mayoral  
89 election, suggesting that political incentives reinforce tropical deforestation (Cisneros et al., 2021).  
90 This suggests that elections can influence deforestation, but broad generalizations should be made  
91 cautiously given the limited geographical scope, or the limited quality and resolution of deforestation  
92 data used in these studies so far.

93 Elections could increase deforestation via multiple mechanisms. Elections are power  
94 struggles where politicians aim to gain an advantage over opponents. These advantages can be  
95 achieved through popular policies and by creating economic opportunities (Akhmedov and  
96 Zhuravskaya, 2003; Drazen and Eslava, 2010; Nordhaus, 1975). For example, politicians might gift or  
97 promise forested land for exploitation to win favour with powerful potential supporters, or with  
98 businesses such as developers and loggers. A real world example occurred in Uganda in 2011, where  
99 the incumbent government promised forests to win community support (Médard and Golaz, 2013). A  
100 similar example is the 2018 Brazilian presidential elections which caused a spike in deforestation due  
101 to candidates promising the dismantling of environmental laws (Abessa et al., 2019). Leading up to  
102 elections, governments may be so focussed on electioneering that diverts their attention from  
103 environmental protection and turn a blind-eye to people utilising forest resources, allowing them to  
104 harvest unsustainably or to settle on protected forested land (Negret et al., 2017). Most countries  
105 have strong laws against winning political favour through financial bribery. However, environmental  
106 protection laws are usually less rigorously monitored or upheld than financial laws, making winning  
107 support by giving away land and forest resources an attractive alternative to money (Ohman, 2013).  
108 There are many mechanisms for elections to drive deforestation but the effect of elections on  
109 deforestation remains under-investigated, especially at broad geographic extents.

110 Here, we analyse the effect of elections as drivers of deforestation at a pantropical scale. We  
111 focus on the tropics because the mechanisms and drivers of deforestation are fairly distinct from the  
112 higher latitude forests in the temperate, boreal and taiga zone (Curtis et al., 2018). To assess the  
113 drivers of tropical deforestation, we first explored the directionality and shape of temporal trends in  
114 deforestation within 55 pantropical countries from 2001 to 2018 using remotely-sensed global forest  
115 loss data (Hansen et al., 2013). High-resolution (30 × 30 metre) year-by-year global forest loss data is  
116 now available from 2000 to 2018 (Hansen et al., 2013), providing new opportunities to study the  
117 effect of elections on deforestation more accurately and at unprecedented spatial extents.

118 We created an annual database over this time period covering the year in which national  
119 elections took place and which type of election it was (presidential, lower chamber, and upper  
120 chamber elections). We further extracted additional information on governance (e.g.  
121 competitiveness, media integrity, corruption control) and human population density. We used a  
122 Hierarchical generalized additive model (HGAM; Pedersen 2019) to assess the effect of election and  
123 the governance variables on the proportional deforestation of countries relative to their forest cover  
124 in the year 2000. This HGAM approach allows the modelling of non-linear functional relationships  
125 between covariates and outcomes where the shape of the function itself varies between different  
126 grouping levels (e.g. countries). This technique allowed us to disaggregate the changes in forest loss  
127 in each country over time - which can be driven by various factors - from the election covariates.  
128 These analyses allowed us to (1) quantify the effect of presidential, lower chamber, and upper  
129 chamber elections on tropical deforestation rates compared to non-election years, and (2) to test  
130 whether the competitiveness of an election has an effect on deforestation.

131

## 132 **2. Methods**

### 133 *2.1 Data collection*

134 We developed an annual 2001–2018 database for 55 tropical-forest countries (Table A1; Figure A1)  
135 covering national and state-level deforestation, election dates, governance variables and human  
136 population density. The governance variables included competitiveness of elections, media integrity  
137 of a country, and control of corruption (Table 1). Human population density captured the number of  
138 residents per country area (Table 1).

139 We extracted annual forest loss data for each country for the years 2001–2018 using high  
140 resolution (30 × 30 metre) global maps of forest cover and forest loss (Hansen et al., 2013). Data  
141 were extracted and processed in the Google Earth Engine (<https://earthengine.google.com>), a cloud  
142 platform for earth-observation data analysis (Gorelick et al., 2017). We adapted code from Tracewski  
143 et al. (2016) to quantify forest loss per year and country, and make our code available via GitHub  
144 (<https://github.com/JoeriMorpurgo/Elections2020>). The Global Forest Change database defines  
145 forest as >50% crown cover of trees taller than 5 m height. The presence of forest is given for each 30  
146 × 30 metre pixel using the year 2000 as a baseline. Forest loss is defined as the disappearance of a  
147 forest pixel in a given year (1 = loss, 0 = no loss). A given forest pixel can only be lost once (in years  
148 2001–2018). We used the available data on forest cover (year 2000) and forest loss (years 2001–  
149 2018) to calculate the proportional loss (i.e. deforestation) over a given year within (sub)national  
150 boundaries relative to the forest cover in the year 2000 (see methodological example in Figure A1).  
151 We did not include ‘gain’ in forest area because it is only provided as a total over the whole time

152 period (Hansen et al., 2013) and because it is often due to plantation forests rather than natural  
153 regrowth or restoration (Tropek et al., 2014). The Global Forest Change data is considered the most  
154 accurate global deforestation data available. However, we acknowledge limitations such as the  
155 inability to differentiate between forest and agro-forests, which have been discussed elsewhere  
156 (Tropek et al., 2014, Allan et al. 2017).

157 We gathered data on when national level elections took place by examining each country's  
158 constitution, and cross-checking this with a number of election databases (see Table B2). In the few  
159 cases where we could not find a formal source we utilised Wikipedia ( $n = 4$ , 0.9%), which is regarded  
160 as a credible source for election data (Brown, 2011). We collected information on three types of  
161 national elections: (i) *Lower chamber elections*, where the lower chamber holds the legislative power  
162 allowing them to create laws; (ii) *Upper chamber elections*, where the upper chamber reviews the  
163 legislative power; and (iii) *Head-of-state or head-of-government elections* (hereafter called  
164 '*presidential elections*') depending on who holds the executive power to enforce the law and is  
165 elected. All countries analysed had a lower chamber and presidential elections. However, many  
166 countries did not have upper chamber elections (25 out of 55 countries, i.e. 45%). Presidential and  
167 upper chamber election dates often occur in the same year as lower chamber elections (52% and  
168 38% of the time, respectively). All election types were treated as a binary predictor variable (1 = year  
169 with election, 0 = no election), i.e. either occurring in a given year or not.

170 We extracted governance information and human population density from various sources  
171 (for details see Table 1). Elections were scored as competitive (= 1) when they are sufficiently free for  
172 the opposition to gain legislative or executive power with enough votes, and otherwise as non-  
173 competitive (= 0) (see 'Competitive elections' in Table 1). Note that this variable does not capture  
174 whether parties have equal funding, media coverage or whether civil liberties are respected. Hence,  
175 competitive elections are not equal to free and fair elections (Skaaning et al., 2015). We further used  
176 an index from the World Bank which captures the control of corruption, which has been linked to  
177 both tropical deforestation and enhancing election cycles (Kaufmann et al., 2011; Pereira et al., 2009;  
178 Smith et al., 2003). We also extracted a variable which quantifies to what extent media are diverse  
179 and critical ('Media integrity' in Table 1), as this has been shown to counter the effects of election  
180 cycles (Akhmedov and Zhuravskaya, 2003; Tufis, 2019). Finally, we also accounted for human  
181 population density, since higher densities at a national level tend to increase deforestation (World  
182 bank, 2020). All predictor variables, included in the analysis, were compiled at national and annual  
183 scale. Four countries lacked data on 'Competitive elections', leading to exclusion in the Hierarchical  
184 Generalized Additive Modelling (Table A1).

185 **Table 1. Summary of predictor variables which were included in Hierarchical Generalized Additive Models to**  
186 **explain proportional deforestation of a country relative to the forest cover in the year 2000 (response**  
187 **variable).** The predictor variables capture governance aspects (competitive elections, media integrity and  
188 control of corruption) and human population density.

| Variable                 | Definition and methods                                                                                                                                                                                                                                                                                                                                                                                                                                                                                                                                                                                                                                                                                                                                         | Reference & source    |
|--------------------------|----------------------------------------------------------------------------------------------------------------------------------------------------------------------------------------------------------------------------------------------------------------------------------------------------------------------------------------------------------------------------------------------------------------------------------------------------------------------------------------------------------------------------------------------------------------------------------------------------------------------------------------------------------------------------------------------------------------------------------------------------------------|-----------------------|
| Competitive elections    | Competitive elections (referred to as 'Competitive' in our analysis) is a binary variable that quantifies whether elections are sufficiently free for the opposition to gain legislative or executive power (1) or not (0). This reflects whether the seats of the executive and legislative body are filled by elections that are characterized by uncertainty in terms of the final outcome. This includes that (1) the legislature is only constitutionally dissolved, (2) members of the executive or legislative are only constitutionally removed, (3) elections are held at a time consistent with constitutional requirements, (4) non-extremist parties are not banned, and (5) voters experience little systematic coercion in their electoral vote. | Tufis, 2019           |
| Media integrity          | Media integrity measures to what extent media are diverse and critical on governmental issues. It is a continuous composite variable with a range 0.00–0.83, based on five indicators: (1) How often media are critical of the government, (2) how wide the range of media perspectives is, (3) if there is media bias against government opposition, (4) whether media accepts bribes to alter news coverage, and (5) to what extent criticism of the government is common and normal in the mediated public sphere.                                                                                                                                                                                                                                          | Tufis, 2019           |
| Control of corruption    | Control of corruption measures the perception of corruption by public power for private gain. It is an continuous index with a range -1.68–0.76, created by modelling 50 variables on corruption. It intends to capture the extent to which public power is exercised for private gain. This includes both petty and grand forms of corruption, and the 'capture' of state assets by elite and private interests.                                                                                                                                                                                                                                                                                                                                              | Kaufmann et al., 2011 |
| Human population density | Population density is defined as all residents of a given political unit divided by its area (i.e. individuals per km <sup>2</sup> of terrestrial land of a country). Refugees who are not permanently settled are excluded. The variable is continuous and ranges 3.05–498.66.                                                                                                                                                                                                                                                                                                                                                                                                                                                                                | World bank, 2020      |

189

190

191 2.2 Statistical analyses

192 The statistical analysis aimed to assess (1) the directionality and shape of temporal trends in  
193 deforestation, (2) the effect of presidential, lower chamber, and upper chamber elections on  
194 deforestation, and (3) the effect of competitiveness of elections on deforestation trends.

195

196 First, we used a non-parametric Mann-Kendall test (Kendall, 1938; Mann, 1945) to test for  
197 monotonic trends (i.e. directionality) of deforestation over time for each country. This test is more  
198 robust to outliers, non-normality and temporally autocorrelated data than simple linear models and  
199 is widely used in time-series analysis (Yue et al., 2002).

200

201 Second, we used Hierarchical Generalized Additive Models (HGAM) (Lin and Zhang, 1999; Pedersen  
202 et al., 2019; Wood, 2017) to model non-linear trends in deforestation in relation to election type and  
203 competitiveness of elections. The flexible nature of HGAMs allows for modelling smooth patterns  
204 across space and over time, with the amount of smoothing controlled to prevent over-fitting (Wood  
205 2017). The HGAM approach thus allows the modelling of non-linear functional relationships between  
206 covariates and outcomes where the shape of the function itself varies between different grouping  
207 levels. In our case, this grouping variable was the country level. This technique allowed us to  
208 disaggregate the changes in forest loss in each country over time - which can be driven by various  
209 factors - from the election covariates. Our models used a global smoother plus country-level  
210 smoothers with differing wiggleness (Pedersen et al., 2019).

211

212 We used three separate HGAMs to model each election type independently: a presidential model, a  
213 lower chamber model and an upper chamber model. The general mathematical formulation of the  
214 HGAMs was:

215

$$\begin{aligned} g(\text{Deforestation}) &= \text{Election} + (\text{Election} \times \text{Competitive}) + f(\text{Pop density}) + f(\text{Media integrity}) \\ &+ f(\text{Corruption}) + f_{\text{Country}}(\text{Year}) + \zeta_{\text{Country}} + \epsilon \end{aligned}$$

216 Where  $g(\text{Deforestation})$  is the response variable defined as proportional deforestation of a country  
217 relative to the forest cover in the year 2000. The binary predictor variable  $\text{Election}$  is 1 when an  
218 election is being held in a given year, and 0 if not. The  $\text{Election}$  term differs among HGAMs because  
219 of the different election data (presidential, lower chamber or upper chamber). The binary predictor  
220 variable  $\text{Competitive}$  is 1 if the election setting is competitive, and 0 if it is not, and modelled as an  
221 interaction with the  $\text{Election}$  term (i.e.  $\text{Election} \times \text{Competitive}$ ). The predictors  $f(\text{Pop density}_i)$ ,  
222  $f(\text{Media integrity}_i)$  and  $f(\text{Corruption}_i)$  are all modelled smooths allowing for non-linear  
223 relationships. All smooths used penalized thin plate regression splines (TPRS) (Wood, 2003). With  
224 these splines, the null space is also penalized slightly, and the whole term can therefore be shrunk to  
225 zero, effectively acting as a model fitting step (Wood, 2003). The additional advantage of the TPRS  
226 approach is that knot positions were selected automatically from the data, eliminating knot  
227 placement subjectivity. Random effects are described by  $\zeta_{\text{Country}}$ , which accounts for country-level  
228 mean differences of deforestation at the intercept as suggested by Pedersen et al. (2019). The term  
229  $f_{\text{Country}}(\text{Year})$  is a separate univariate smooth for each country to account for intergroup  
230 variability. We used a Gaussian process smooth to account for temporal autocorrelation (Wood,  
231 2017). Finally,  $\epsilon$  describes the error that is not explained by the other terms. HGAMs were modelled



232 using a beta regression logit link structure to account for the proportional nature of the response  
233 variable which is bound between 0 and 1, and overcomes limitations in other more commonly used  
234 distributions (Douma and Weedon, 2019). For each term the penalty controlling the degree of  
235 smoothing was selected using restricted maximum likelihood (REML; Wood 2017, p. 185)

236

237 The autocorrelation function of the residuals, concurvity and model residuals were visually inspected  
238 for all models, and no issues were identified. The supplementary material provides the  
239 autocorrelation function of the residuals (Figure B1), the concurvity (Figure C 1–3), and the model  
240 residuals (Figure D1).

241

### 242 **3. Results**

243

#### 244 *3.1 Global deforestation trends from 2001 to 2018*

245

246 We found that 1.5 million km<sup>2</sup> of tropical forest – an area similar in size to Mongolia – was lost  
247 between 2001 and 2018 in the 55 tropical countries analysed (Table 1A). The largest area of forest  
248 loss occurred in Brazil (469.839 km<sup>2</sup>), followed by Indonesia (227.008 km<sup>2</sup>) and the Democratic  
249 Republic of Congo (112.626 km<sup>2</sup>) (Figure 1A). On average, 0.52% of the world's tropical forests were  
250 lost each year from 2001 to 2018 (SD = 0.15%, range = 0.35%–0.91%,  $n = 55$  countries). The overall  
251 proportion of pantropical deforestation has increased during this time by 182%, with 37 out of the 55  
252 assessed countries (67%) showing statistically significant increases (demonstrated by Mann Kendall  
253 tests showing statistically significant positive tau values at  $p < 0.05$ ) (Figure 1B). Only four countries  
254 decreased in their annual rate of deforestation (indicated by negative tau values of the Mann Kendall  
255 tests), but these were statistically not significant (at  $p > 0.05$ ).

256

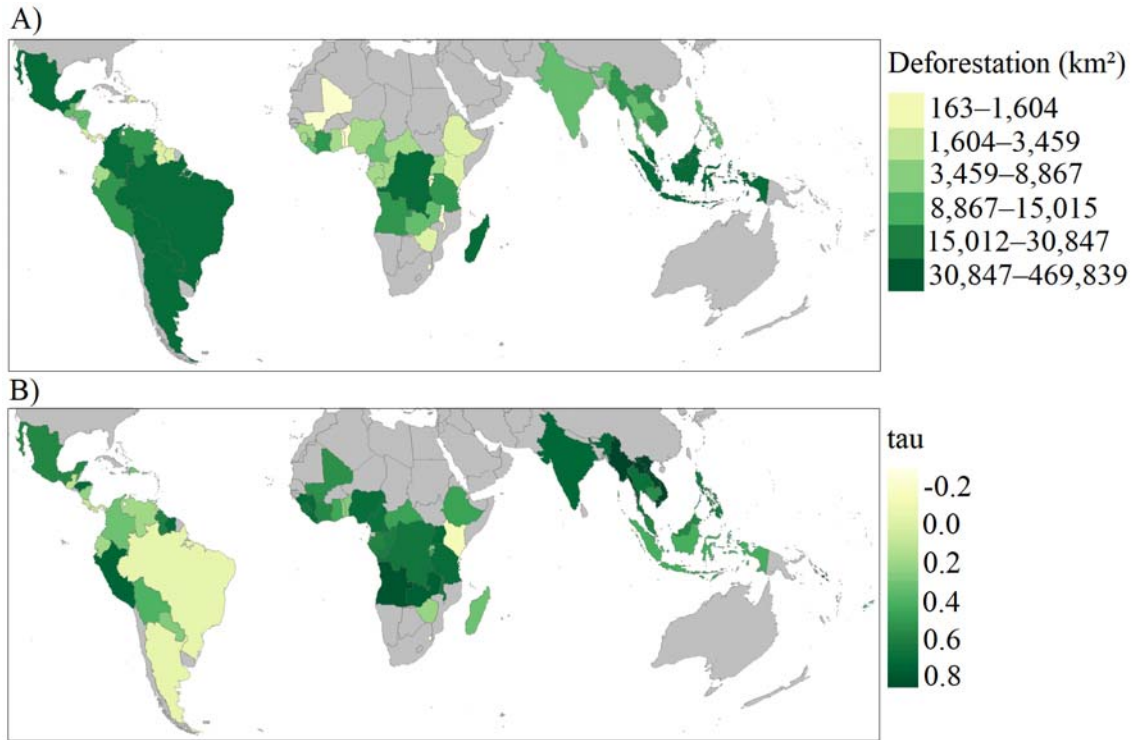

257

258 **Figure 1. Deforestation in 55 tropical countries between 2001–2018.** A) Total amount of deforestation (in km<sup>2</sup>)  
259 at a national scale from 2001–2018. B) Directionality and strength of national deforestation trends quantified  
260 as correlation coefficients (Tau values) from Mann Kendall tests. A total of 51 countries show an increase in the  
261 annual rate of deforestation (light green-green: positive Tau values) whereas four countries show a decrease  
262 (light yellow: negative Tau values). Annual forest loss data for each country were derived from high resolution  
263 (30 × 30 metre) global maps of forest cover and forest loss (Hansen et al., 2013).  
264

265 The shapes of deforestation trends derived from the HGAMs varied considerably among  
266 countries ( $n = 51$ ) (Figure 2A). In general, they followed five main typologies (Figure 2B–F): linearly  
267 increasing, linearly decreasing, curvilinearly increasing, curvilinearly decreasing and fluctuating. We  
268 visually inspected these deforestation trends for each country and found that the rate of  
269 deforestation increased in 36 (71%) of the analysed countries ( $n = 51$ ). Of those, 24 countries showed  
270 a linearly increasing deforestation trend (Figure 2B) and 12 countries an increasing curvilinear trend  
271 (Figure 2D). Two countries showed a linearly decreasing trend (Figure 2C) and five countries  
272 curvilinearly decreasing trend (Figure 2E). A total of 8 countries were classified as having fluctuating  
273 deforestation trends (Figure 2F).  
274  
275

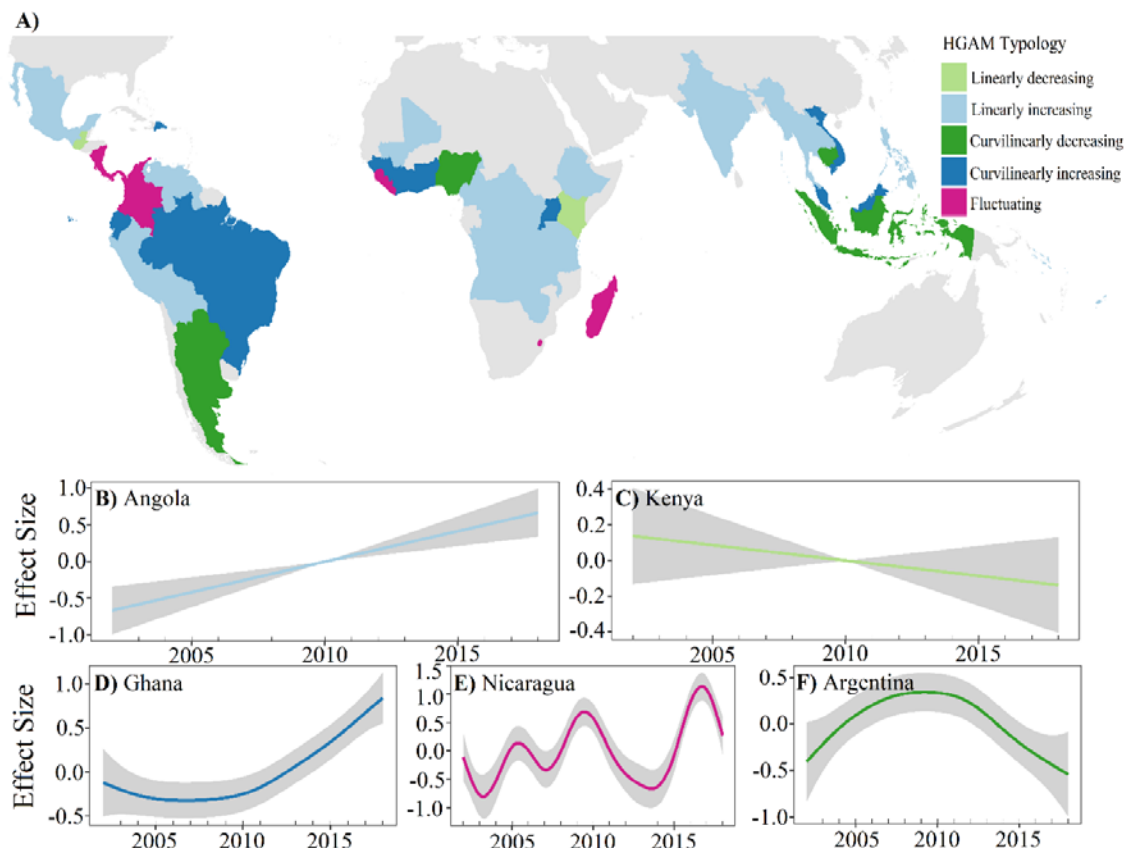

276  
277 **Figure 2. National deforestation trends between 2001–2018 across the tropics.** A) Pantropical overview of  
278 main typologies of deforestation trends (linearly increasing, linearly decreasing, curvilinearly increasing,  
279 curvilinearly decreasing and fluctuating) as derived from Hierarchical Generalized Additive Models (HGAMs).  
280 Examples of trend typologies: B) linearly increasing (Angola), C) linearly decreasing (Kenya), D) curvilinearly  
281 increasing (Ghana), E) fluctuating (Nicaragua), and F) curvilinearly decreasing (Argentina).

### 282 3.2 Election types and deforestation

283 All three HGAMs had high explanatory power ( $R^2 > 0.87$ , explained deviance  $> 90\%$ , see Table 2) and  
284 show that tropical deforestation is lower in years when there is a presidential or lower chamber  
285 election, compared to years with no election (Figure 3A, B). This is demonstrated by the negative and  
286 statistically significant logit estimate for in the two HGAMs for presidential and lower  
287 chamber elections (Table 2). The logit estimate for the upper chamber HGAM also showed a negative  
288 sign but was statistically not significant (Table 2, Figure 3C).

289

290 *3.3 Effect of competitiveness on deforestation*

291 Deforestation was significantly higher in competitive presidential and lower chamber election years,  
292 compared to non-competitive election years (Figure 4A, B). This is demonstrated in the positive and  
293 statistically significant interaction term *Election* × *Competitive* in the presidential and lower  
294 chamber HGAMs (Table 2). The upper chamber HGAM showed a negative interaction term  
295 *Election* × *Competitive* but this was not statistically significant (Table 2, Figure 4C). None of the  
296 other predictors (human population density, media integrity, and control of corruption) showed a  
297 statistically significant effect on deforestation trends (Table 2).

298

299

300

301

302

303

304

305

306

307

308

309

310

311

312

313

314

315

316

317

318

319

320

321 **Table 2. Results of Hierarchical Generalized Additive Models (HGAMs) with a logit-link to explain the proportional deforestation of a country relative to the forest cover**  
 322 **in the year 2000 (response variable). Three different HGAMs were implemented depending on the specific election type (presidential, lower chamber, or upper chamber**  
 323 **election).** Binary predictor variables are shown with parametric coefficients (logit estimates) whereas continuous variables are represented with smooth terms. For details  
 324 of predictor variables see Table 1. Country-level estimates ( $n = 51$  countries) were excluded from this table. Statistically significant  $p$ -values ( $p < 0.05$ ) are indicated in bold.

| Predictor                        | Presidential model |                   |                        |                  | Lower chamber model |                   |                        |                  | Upper chamber model |                   |                        |                  |
|----------------------------------|--------------------|-------------------|------------------------|------------------|---------------------|-------------------|------------------------|------------------|---------------------|-------------------|------------------------|------------------|
|                                  | <i>Estimate</i>    | <i>Std. error</i> | <i>Z-value</i>         | <i>p</i>         | <i>Estimate</i>     | <i>Std. error</i> | <i>Z-value</i>         | <i>p</i>         | <i>Estimate</i>     | <i>Std. error</i> | <i>Z-value</i>         | <i>p</i>         |
| <i>Intercept</i>                 | -5.47              | 0.10              | -57.10                 | <b>&lt;0.001</b> | -5.47               | 0.10              | -56.90                 | <b>&lt;0.001</b> | -5.52               | 0.14              | -40.34                 | <b>&lt;0.001</b> |
| Parametric coefficients          |                    |                   |                        |                  |                     |                   |                        |                  |                     |                   |                        |                  |
| <i>Election</i>                  | -0.19              | 0.06              | -3.07                  | <b>0.002</b>     | -0.10               | 0.04              | -2.33                  | <b>0.02</b>      | -0.02               | 0.06              | -0.35                  | 0.73             |
| <i>Election × Competitive</i>    | 0.16               | 0.07              | 2.30                   | <b>0.02</b>      | 0.13                | 0.06              | 2.26                   | <b>0.02</b>      | -0.01               | 0.07              | 0.09                   | 0.93             |
| Smooth term                      |                    | <i>edf</i>        | <i>Chi<sup>2</sup></i> | <i>p</i>         |                     | <i>edf</i>        | <i>Chi<sup>2</sup></i> | <i>p</i>         |                     | <i>edf</i>        | <i>Chi<sup>2</sup></i> | <i>p</i>         |
| <i>f (Population density)</i>    |                    | <0.001            | <0.001                 | 0.79             |                     | <0.001            | <0.001                 | 0.82             |                     | <0.001            | <0.001                 | 0.36             |
| <i>f (Media integrity)</i>       |                    | <0.001            | <0.001                 | 0.41             |                     | <0.001            | <0.001                 | 0.37             |                     | 4.70              | 454.09                 | 0.39             |
| <i>f (Control of corruption)</i> |                    | <0.001            | <0.001                 | 0.70             |                     | <0.001            | <0.001                 | 0.67             |                     | <0.001            | <0.001                 | 0.70             |
| Adjusted R <sup>2</sup>          | 0.87               |                   |                        |                  | 0.87                |                   |                        |                  | 0.91                |                   |                        |                  |
| Explained deviance               | 90.2%              |                   |                        |                  | 90.1%               |                   |                        |                  | 93.2%               |                   |                        |                  |

325  
 326  
 327  
 328

329

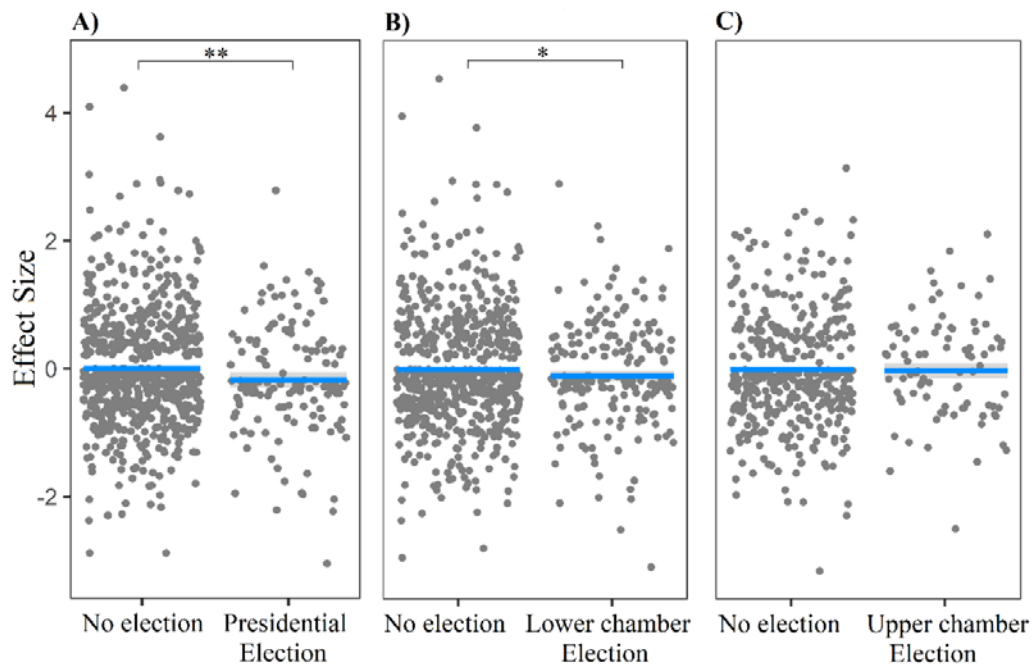

330

331

332

333

334

**Figure 3. The effect of elections on deforestation.** Each point represents the amount of logit-transformed deforestation in a given year and country. The presidential election and lower chamber election (A and B) show statistically significant lower deforestation compared to non-election years (compare results for term in Table 2). Upper chamber elections (C) show a similar but statistically not significant trend.

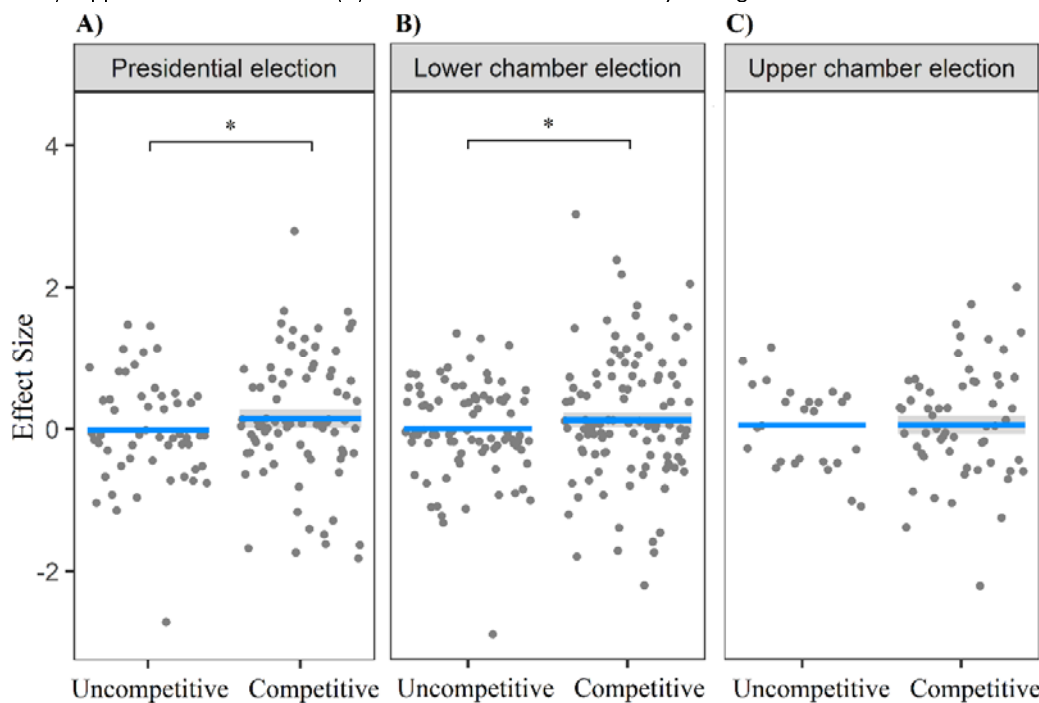

335

336

337

338

339

340

**Figure 4. The effect of competitive elections on deforestation.** Each point represents the amount of logit-transformed deforestation in an election year by country. Competitive presidential and lower chamber elections (A, B) show statistically significant higher deforestation compared to uncompetitive elections (compare results for interaction term in Table 2). Upper chamber elections (C) show an opposite but statistically not significant trend.

341 **4. Discussion**

342 We analysed the effect of elections on deforestation in 55 tropical countries over an 18-year time  
343 period and found that competitive elections are potential drivers of pantropical deforestation,  
344 whereas a general effect of election years on deforestation was not confirmed. We focused on  
345 tropical forests because they are predominantly lost due to agriculture and commodities exploitation  
346 rather than changes caused by forestry management and wildfires, as for instance in boreal and taiga  
347 forests (Curtis et al., 2018). Our results document a massive tropical forest loss from 2000 to 2018,  
348 with the rate of deforestation increasing in more than two-thirds of the studied countries. To our  
349 knowledge, this represents the most comprehensive and most up-to-date study of its kind covering a  
350 pantropical extent.

351 Our results confirm the well-known trend that deforestation rates are increasing across the  
352 tropics (Curtis et al., 2018). This is alarming since deforestation is accelerating while the remaining  
353 forest area is becoming smaller. While the majority of studied countries (70.5%, HGAM) show linearly  
354 or curvilinearly increasing deforestation trends, there are a few countries in which deforestation is  
355 decreasing (13.7%) or fluctuating with sporadic increases and decreases (15.6%). The decreases  
356 observed in our results seem to coincide with the implementation of forest protection policies or  
357 actions. For example, in 2004, The Brazilian Government founded the country's environmental  
358 enforcement agency (IBAMA) which led to a 37% reduction in deforestation between 2005 and 2007,  
359 by using in field enforcement using real time deforestation detection (Arima et al., 2014; Soares-Filho  
360 et al., 2010). Similarly, conservation in the Colombian Guyana Shield reduced deforestation in  
361 protected area's compared to their buffer zone, with only 1% of the natural forest in protected areas  
362 lost, while the buffer zones lost between 5–7% between 1985 and 2002. In particular, the reduced  
363 deforestation in protected areas was linked with lower infrastructure, accessibility and reduction in  
364 illicit agriculture (Armenteras et al., 2009). These examples are encouraging since they show that  
365 policy tools and conservation intervention can effectively limit deforestation and that governments  
366 have the means to take the necessary steps to halt ongoing deforestation (Busch et al., 2015; Rudorff  
367 et al., 2011; Umemiya et al., 2010; Wehkamp et al., 2018).

368 In contrast to our expectation, we found that deforestation was significantly lower in  
369 election years than in non-election years. This is, for instance, opposite to a study at the national  
370 scale of Brazil where municipal-level deforestation increased by 8–10% in years with a municipal  
371 election (Pailler 2018). In general, election theory suggests that politicians should utilise all avenues  
372 possible to win support and favour in the lead up to an election, which includes giving away or  
373 promising forested land for development, or turning a blind eye to forest exploitation (Abessa et al.,

374 2019; Akhmedov and Zhuravskaya, 2003; Burgess et al., 2012; Shi and Svensson, 2006). We suggest  
375 that there are several plausible explanations why our analysis did not show such an expected effect.

376 First, forested land might be exploited before an election, causing an increase in  
377 deforestation above baseline levels. This exploitation may then stop shortly after an election, and  
378 result in a decrease of deforestation. This has been observed in some countries, for example in  
379 Russia, where election cycles in social expenditure from local governments generally drop one month  
380 after the election (Akhmedov and Zhuravskaya, 2003). This makes it difficult to detect a signal of  
381 elections on deforestation rates when analysing deforestation in yearly intervals since the pre-and  
382 post-election increase and decrease could cancel each other out. The global forest loss data that we  
383 used is currently only available in yearly intervals (Hansen et al., 2013) and thus does not account for  
384 short term pre/post-election changes in deforestation rates (e.g. within years). More detailed data  
385 (e.g. capturing intra-annual variation in deforestation rates during election periods) could benefit  
386 future studies of forest loss at national and global scales.

387 A second plausible reason for not detecting an increase of deforestation with presidential,  
388 lower and upper chamber elections is that forest governance and natural resource management is  
389 increasingly becoming decentralised within countries (Ginsburg and Keene, 2020). In principle,  
390 decentralisation should make it more difficult for national level politicians to exploit locally managed  
391 resources (Busch and Amarjargal, 2020). It is difficult to account for this decentralisation in global  
392 analyses because appropriate data to quantify the degree of local or municipal autonomy in forest  
393 management are lacking. Additionally, election data on the subnational administrative units that  
394 manage the forests are often missing. Hence, it is possible that local governments protect their  
395 forests from exploitation by higher level politicians during national election years. An alternative way  
396 to study this could be to investigate the effect of elections on deforestation at the spatial scale at  
397 which forest management decision are made. For instance, if forests are managed at the state or  
398 county level, the effects of state or county-level elections on deforestation could be analysed. To our  
399 knowledge, there are currently no global databases available that specify the level and spatial scale  
400 of forest governance.

401 Besides the general effect of presidential, lower and upper chamber elections on  
402 deforestation, our analysis revealed that deforestation is significantly higher in competitive election  
403 years compared to non-competitive election years. This supports our expectation that more  
404 competitive elections will increase incentives for politicians to misuse public goods for winning  
405 favour (Sanford, 2019; Shi and Svensson, 2006). To improve forest protection, we recommend that  
406 integrity and transparency monitoring schemes for elections such as the Global Network of Domestic



407 Election Monitors (GNDEM) extend their mandate to include monitoring natural resources such as  
408 forests (Pereira et al., 2009; Shi and Svensson, 2006). Conservation groups should also remain vigilant  
409 during the lead up to elections, especially given land gifting practices for forest exploitation during  
410 the elections of Uganda in 2011 (Médard and Golaz, 2013).

## 411 **5. Conclusions**

412 Protecting biodiversity in tropical forests and their ecosystem services is crucial for meeting  
413 international policy targets such as the United Nations Sustainable Development Goals (SDGs) and  
414 the post-2020 targets of the Convention on Biological Diversity (CBD). Our analysis shows that  
415 tropical forests continue to decline and that elections can at least partly play a role in driving  
416 deforestation trends. However, more detailed data on intra-annual variation of deforestation and the  
417 spatial scale of forest governance are needed to improve our global (pan-tropical and cross-national)  
418 understanding of how elections influence forest loss driven. We urge electoral management bodies  
419 and conservation groups to be vigilant during competitive elections, because forests and other  
420 natural resources could be traded for votes. Further elucidating the role of elections on deforestation  
421 should be a focus of forest conservation efforts.

422

## 423 **6. Data accessibility**

424 Data and code used for this study have been made permanently and publicly available on the  
425 Mendeley Data repository at <http://dx.doi.org/10.17632/5ngc9n3shd.1>.

426

427

428

429

430

431

432 **7. Literature**

- 433 Abessa, D., Famá, A., Buruaem, L., 2019. The systematic dismantling of Brazilian environmental laws  
434 risks losses on all fronts. *Nature Ecology & Evolution* 3, 510–511.  
435 <https://doi.org/10.1038/s41559-019-0855-9>
- 436 Akhmedov, A., Zhuravskaya, E. V., 2003. Opportunistic political cycles: Test in a young democracy  
437 setting. *SSRN Electronic Journal* 119, 1301–1338. <https://doi.org/10.2139/ssrn.396240>
- 438 Angelsen, A., Jagger, P., Babigumira, R., Belcher, B., Hogarth, N.J., Bauch, S., Börner, J., Smith-Hall, C.,  
439 Wunder, S., 2014. Environmental income and rural livelihoods: A global-comparative analysis.  
440 *World Development* 64, S12–S28. <https://doi.org/10.1016/j.worlddev.2014.03.006>
- 441 Arima, E.Y., Barreto, P., Araújo, E., Soares-Filho, B., 2014. Public policies can reduce tropical  
442 deforestation: Lessons and challenges from Brazil. *Land Use Policy* 41, 465–473.  
443 <https://doi.org/10.1016/j.landusepol.2014.06.026>
- 444 Armenteras, D., Rodríguez, N., Retana, J., 2009. Are conservation strategies effective in avoiding the  
445 deforestation of the Colombian Guyana Shield? *Biological Conservation* 142, 1411–1419.  
446 <https://doi.org/10.1016/j.biocon.2009.02.002>
- 447 Austin, K.G., González-Roglich, M., Schaffer-Smith, D., Schwantes, A.M., Swenson, J.J., 2017. Trends  
448 in size of tropical deforestation events signal increasing dominance of industrial-scale drivers.  
449 *Environmental Research Letters* 12, 054009. <https://doi.org/10.1088/1748-9326/aa6a88>
- 450 Bertot, J.C., Jaeger, P.T., Grimes, J.M., 2010. Using ICTs to create a culture of transparency: E-  
451 government and social media as openness and anti-corruption tools for societies. *Government*  
452 *Information Quarterly* 27, 264–271. <https://doi.org/10.1016/j.giq.2010.03.001>
- 453 Brown, A.R., 2011. Wikipedia as a data source for political scientists: Accuracy and completeness of  
454 coverage. *PS: Political Science & Politics* 44, 339–343.  
455 <https://doi.org/10.1017/S1049096511000199>
- 456 Burgess, R., Hansen, M., Olken, B.A., Potapov, P., Sieber, S., 2012. The political economy of  
457 deforestation in the tropics. *Quarterly Journal of Economics* 127, 1707–1754.  
458 <https://doi.org/10.1093/qje/qjs034>
- 459 Busch, J., Amarjargal, O., 2020. Authority of second-tier governments to reduce deforestation in 30  
460 tropical countries. *Frontiers in Forests and Global Change* 3, 1–14.  
461 <https://doi.org/10.3389/ffgc.2020.00001>
- 462 Busch, J., Ferretti-Gallon, K., Engelmann, J., Wright, M., Austin, K.G., Stolle, F., Turubanova, S.,  
463 Potapov, P. V, Margono, B., Hansen, M.C., Baccini, A., 2015. Reductions in emissions from  
464 deforestation from Indonesia's moratorium on new oil palm, timber, and logging concessions.  
465 *Proceedings of the National Academy of Sciences* 112, 1328–1333.  
466 <https://doi.org/10.1073/pnas.1412514112>
- 467 Cisneros, E., Kis-Katos, K., Nuryartono, N., 2021. Palm oil and the politics of deforestation in  
468 Indonesia. *Journal of Environmental Economics and Management* 108, 102453.  
469 <https://doi.org/10.1016/j.jeem.2021.102453>
- 470 Curtis, P.G., Slay, C.M., Harris, N.L., Tyukavina, A., Hansen, M.C., 2018. Classifying drivers of global  
471 forest loss. *Science* 361, 1108–1111. <https://doi.org/10.1126/science.aau3445>
- 472 Dávalos, L.M., Sanchez, K.M., Armenteras, D., 2016. Deforestation and coca cultivation rooted in  
473 twentieth-century development projects. *BioScience* 66, 974–982.  
474 <https://doi.org/10.1093/biosci/biw118>

- 475 Douma, J.C., Weedon, J.T., 2019. Analysing continuous proportions in ecology and evolution: A  
476 practical introduction to beta and Dirichlet regression. *Methods in Ecology and Evolution* 10,  
477 1412–1430. <https://doi.org/10.1111/2041-210X.13234>
- 478 Drazen, A., Eslava, M., 2010. Electoral manipulation via voter-friendly spending: Theory and  
479 evidence. *Journal of Development Economics* 92, 39–52.  
480 <https://doi.org/10.1016/j.jdeveco.2009.01.001>
- 481 Ewers, R.M., 2006. Interaction effects between economic development and forest cover determine  
482 deforestation rates. *Global Environmental Change* 16, 161–169.  
483 <https://doi.org/10.1016/j.gloenvcha.2005.12.001>
- 484 Foley, J.A., Asner, G.P., Heil Costa, M., Coe, M.T., Defries, R., Gibbs, H.K., Howard, E.A., Olson, S., Patz,  
485 J., Ramankutty, N., Snyder, P., 2007. Amazonia revealed: forest degradation and loss of  
486 ecosystem goods and services in the Amazon Basin. *Frontiers in Ecology and the Environment* 5,  
487 25–32. [https://doi.org/10.1890/1540-9295\(2007\)5\[25:ARFDAL\]2.0.CO;2](https://doi.org/10.1890/1540-9295(2007)5[25:ARFDAL]2.0.CO;2)
- 488 Gaston, K.J., 2000. Global patterns in biodiversity. *Nature* 405, 220–227.  
489 <https://doi.org/10.1038/35012228>
- 490 Gibson, L., Lee, T.M., Koh, L.P., Brook, B.W., Gardner, T.A., Barlow, J., Peres, C.A., Bradshaw, C.J.A.,  
491 Laurance, W.F., Lovejoy, T.E., Sodhi, N.S., 2011. Primary forests are irreplaceable for sustaining  
492 tropical biodiversity. *Nature* 478, 378–381. <https://doi.org/10.1038/nature10425>
- 493 Ginsburg, C., Keene, S., 2020. At a crossroads: Consequential trends in recognition of community-  
494 based forest tenure from 2002–2017. *China Economic Journal* 13, 223–248.  
495 <https://doi.org/10.1080/17538963.2020.1755129>
- 496 Gorelick, N., Hancher, M., Dixon, M., Ilyushchenko, S., Thau, D., Moore, R., 2017. Google Earth  
497 Engine: Planetary-scale geospatial analysis for everyone. *Remote Sensing of Environment* 202,  
498 18–27. <https://doi.org/10.1016/j.rse.2017.06.031>
- 499 Hansen, M.C., Potapov, P. V., Moore, R., Hancher, M., Turubanova, S.A., Tyukavina, A., Thau, D.,  
500 Stehman, S. V., Goetz, S.J., Loveland, T.R., Kommareddy, A., Egorov, A., Chini, L., Justice, C.O.,  
501 Townshend, J.R.G., 2013. High-resolution global maps of 21st-century forest cover change.  
502 *Science* 342, 850–853. <https://doi.org/10.1126/science.1244693>
- 503 Heltberg, R., Arndt, T.C., Sekhar, N.U., 2000. Fuelwood consumption and forest degradation: A  
504 household model for domestic energy substitution in rural India. *Land Economics* 76, 213–232.  
505 <https://doi.org/10.2307/3147225>
- 506 Hosonuma, N., Herold, M., De Sy, V., De Fries, R.S., Brockhaus, M., Verchot, L., Angelsen, A., Romijn,  
507 E., 2012. An assessment of deforestation and forest degradation drivers in developing  
508 countries. *Environmental Research Letters* 7, 044009. <https://doi.org/10.1088/1748-9326/7/4/044009>
- 510 Joshi, A.K., Joshi, P.K., 2019. Forest ecosystem services in the central Himalaya: Local benefits and  
511 global relevance. *Proceedings of the National Academy of Sciences, India Section B: Biological*  
512 *Sciences* 89, 785–792. <https://doi.org/10.1007/s40011-018-0969-x>
- 513 Kaufmann, D., Kraay, A., Mastruzzi, M., 2011. The worldwide governance indicators: Methodology  
514 and analytical issues. *Hague Journal on the Rule of Law* 3, 220–246.  
515 <https://doi.org/10.1017/S1876404511200046>
- 516 Kendall, M.G., 1938. A new measure of rank correlation. *Biometrika* 30, 81.  
517 <https://doi.org/10.2307/2332226>

- 518 Koh, L.P., Wilcove, D.S., 2008. Is oil palm agriculture really destroying tropical biodiversity?  
519 Conservation Letters 1, 60–64. <https://doi.org/10.1111/j.1755-263x.2008.00011.x>
- 520 Kolstad, I., Wiig, A., 2009. Is transparency the key to reducing corruption in resource-rich countries?  
521 World Development 37, 521–532. <https://doi.org/10.1016/j.worlddev.2008.07.002>
- 522 Landholm, D.M., Pradhan, P., Kropp, J.P., 2019. Diverging forest land use dynamics induced by armed  
523 conflict across the tropics. Global Environmental Change 56, 86–94.  
524 <https://doi.org/10.1016/j.gloenvcha.2019.03.006>
- 525 Laurance, W.F., Albernaz, A.K.M., Schroth, G., Fearnside, P.M., Bergen, S., Venticinque, E.M., Da  
526 Costa, C., 2002. Predictors of deforestation in the Brazilian Amazon. Journal of Biogeography 29,  
527 737–748. <https://doi.org/10.1046/j.1365-2699.2002.00721.x>
- 528 Laurance, W.F., Sayer, J., Cassman, K.G., 2014. Agricultural expansion and its impacts on tropical  
529 nature. Trends in Ecology & Evolution 29, 107–116. <https://doi.org/10.1016/j.tree.2013.12.001>
- 530 Lin, X., Zhang, D., 1999. Inference in generalized additive mixed models by using smoothing splines.  
531 Journal of the Royal Statistical Society. Series B: Statistical Methodology 61, 381–400.  
532 <https://doi.org/10.1111/1467-9868.00183>
- 533 List, J.A., Sturm, D.M., 2006. How elections matter: Theory and evidence from environmental policy.  
534 The Quarterly Journal of Economics 121, 1249–1281. <https://doi.org/10.1093/qje/121.4.1249>
- 535 Mann, H.B., 1945. Nonparametric tests against trend. Econometrica 13, 245.  
536 <https://doi.org/10.2307/1907187>
- 537 Médard, C., Golaz, V., 2013. Creating dependency: Land and gift-giving practices in Uganda. Journal  
538 of Eastern African Studies 7, 549–568. <https://doi.org/10.1080/17531055.2013.811027>
- 539 Negret, P.J., Allan, J., Braczkowski, A., Maron, M., Watson, J.E.M., 2017. Need for conservation  
540 planning in postconflict Colombia. Conservation Biology 31, 499–500.  
541 <https://doi.org/10.1111/cobi.12935>
- 542 Negret, P.J., Sonter, L., Watson, J.E.M., Possingham, H.P., Jones, K.R., Suarez, C., Ochoa-Quintero,  
543 J.M., Maron, M., 2019. Emerging evidence that armed conflict and coca cultivation influence  
544 deforestation patterns. Biological Conservation 239, 108176.  
545 <https://doi.org/10.1016/j.biocon.2019.07.021>
- 546 Nordhaus, W.D., 1975. The political business cycle. The Review of Economic Studies 42, 169.  
547 <https://doi.org/10.2307/2296528>
- 548 Ohman, M., 2013. Controlling money in politics: An introduction, International Foundation for  
549 Electoral Systems. Washington.
- 550 Pailler, S., 2018. Re-election incentives and deforestation cycles in the Brazilian Amazon. Journal of  
551 Environmental Economics and Management 88, 345–365.  
552 <https://doi.org/10.1016/j.jeem.2018.01.008>
- 553 Pedersen, E.J., Miller, D.L., Simpson, G.L., Ross, N., 2019. Hierarchical generalized additive models in  
554 ecology: An introduction with mgcv. PeerJ 7, e6876. <https://doi.org/10.7717/peerj.6876>
- 555 Pereira, C., Melo, M.A., Figueiredo, C.M., 2009. The corruption-enhancing role of re-election  
556 incentives?: Counterintuitive evidence from Brazil’s audit reports. Political Research Quarterly  
557 62, 731–744. <https://doi.org/10.1177/1065912908320664>
- 558 Rodrigues-Filho, S., Verburg, R., Bursztyn, M., Lindoso, D., Debortoli, N., Vilhena, A.M.G., 2015.  
559 Election-driven weakening of deforestation control in the Brazilian Amazon. Land Use Policy 43,

- 560 111–118. <https://doi.org/10.1016/j.landusepol.2014.11.002>
- 561 Rudorff, B.F.T., Adami, M., Aguiar, D.A., Moreira, M.A., Mello, M.P., Fabiani, L., Amaral, D.F., Pires,  
562 B.M., 2011. The soy moratorium in the Amazon biome monitored by remote sensing images.  
563 *Remote Sensing* 3, 185–202. <https://doi.org/10.3390/rs3010185>
- 564 Rudow, A., Rotach, P., Küchli, C., Dürr, C., Schmid, S., Bolliger, M., 2013. The state of the world's  
565 forest genetic resources. FAO country report switzerland 2012.
- 566 Sandker, M., Finegold, Y., D'Annunzio, R., Lindquist, E., 2017. Global deforestation patterns:  
567 Comparing recent and past forest loss processes through a spatially explicit analysis.  
568 *International Forestry Review* 19, 350–368. <https://doi.org/10.1505/146554817821865081>
- 569 Sanford, L., 2019. Supporting Information: Democratization, Elections, and Public Goods: The  
570 Evidence from Deforestation.
- 571 Shi, M., Svensson, J., 2006. Political budget cycles: Do they differ across countries and why? *Journal*  
572 *of Public Economics* 90, 1367–1389. <https://doi.org/10.1016/j.jpubeco.2005.09.009>
- 573 Skaaning, S.-E., Gerring, J., Bartusevičius, H., 2015. A lexical index of electoral democracy.  
574 *Comparative Political Studies* 48, 1491–1525. <https://doi.org/10.1177/0010414015581050>
- 575 Smith, J., Obidzinski, K., Subarudi, Suramenggala, I., 2003. Illegal logging, collusive corruption and  
576 fragmented governments in Kalimantan, Indonesia. *International Forestry Review* 5, 293–302.  
577 <https://doi.org/10.1505/IFOR.5.3.293.19138>
- 578 Soares-Filho, B., Moutinho, P., Nepstad, D., Anderson, A., Rodrigues, H., Garcia, R., Dietzsch, L.,  
579 Merry, F., Bowman, M., Hissa, L., Silvestrini, R., Maretti, C., 2010. Role of Brazilian Amazon  
580 protected areas in climate change mitigation. *Proceedings of the National Academy of Sciences*  
581 107, 10821–10826. <https://doi.org/10.1073/pnas.0913048107>
- 582 Tracewski, Ł., Butchart, S.H.M., Donald, P.F., Evans, M., Fishpool, L.D.C., Buchanan, G.M., 2016.  
583 Patterns of twenty-first century forest loss across a global network of important sites for  
584 biodiversity. *Remote Sensing in Ecology and Conservation* 2, 37–44.  
585 <https://doi.org/10.1002/rse2.13>
- 586 Tropek, R., Sedláček, O., Beck, J., Keil, P., Musilová, Z., Imová, I., Storch, D., 2014. Comment on “High-  
587 resolution global maps of 21st-century forest cover change.” *Science* 344, 981–981.  
588 <https://doi.org/10.1126/science.1248753>
- 589 Tufis, C., 2019. The global state of democracy indices codebook, version 3. International Institute for  
590 Democracy and Electoral Assistance. <https://doi.org/10.31752/idea.2019.40>
- 591 Umemiya, C., Rametsteiner, E., Kraxner, F., 2010. Quantifying the impacts of the quality of  
592 governance on deforestation. *Environmental Science and Policy* 13, 695–701.  
593 <https://doi.org/10.1016/j.envsci.2010.07.002>
- 594 Wehkamp, J., Koch, N., Lübbers, S., Fuss, S., 2018. Governance and deforestation — a meta-analysis  
595 in economics. *Ecological Economics* 144, 214–227.  
596 <https://doi.org/10.1016/j.ecolecon.2017.07.030>
- 597 Wood, S.N., 2017. Generalized additive models: An introduction with R, 2nd ed. Chapman and  
598 Hall/CRC. <https://doi.org/10.1201/9781315370279>
- 599 Wood, S.N., 2003. Thin plate regression splines. *Journal of the Royal Statistical Society: Series B*  
600 (Statistical Methodology) 65, 95–114. <https://doi.org/10.1111/1467-9868.00374>
- 601 World bank, 2020. World development indicators [WWW Document]. Population density. URL

602 <https://data.worldbank.org/indicator/EN.POP.DNST> (accessed 5.16.20).

603 Wright, S.J., Sanchez-Azofeifa, G.A., Portillo-Quintero, C., Davies, D., 2007. Poverty and corruption  
604 compromise tropical forest reserves. *Ecological Applications* 17, 1259–1266.  
605 <https://doi.org/10.1890/06-1330.1>

606 Yue, S., Pilon, P., Cavadias, G., 2002. Power of the Mann–Kendall and Spearman’s rho tests for  
607 detecting monotonic trends in hydrological series. *Journal of Hydrology* 259, 254–271.  
608 [https://doi.org/10.1016/S0022-1694\(01\)00594-7](https://doi.org/10.1016/S0022-1694(01)00594-7)

609

## 610 **7. Web references**

611 FEWS (2009), Madagascar admin 2, 2D map Viewed 19 March 2020, < [https://fews.net/fews-](https://fews.net/fews-data/334?tid=37&field_data_portal_date_start%5Bvalue%5D%5Byear%5D=&field_data_portal_date_start%5Bvalue%5D%5Bmonth%5D=&field_data_portal_date_end%5Bvalue%5D%5Byear%5D=&field_data_portal_date_end%5Bvalue%5D%5Bmonth%5D=>)  
612 [data/334?tid=37&field\\_data\\_portal\\_date\\_start%5Bvalue%5D%5Byear%5D=&field\\_data\\_portal\\_date\\_start%5Bvalue%5D%5Bmonth%5D=&field\\_data\\_portal\\_date\\_end%5Bvalue%5D%5Byear%5D=&field\\_data\\_portal\\_date\\_end%5Bvalue%5D%5Bmonth%5D=>](https://fews.net/fews-data/334?tid=37&field_data_portal_date_start%5Bvalue%5D%5Byear%5D=&field_data_portal_date_start%5Bvalue%5D%5Bmonth%5D=&field_data_portal_date_end%5Bvalue%5D%5Byear%5D=&field_data_portal_date_end%5Bvalue%5D%5Bmonth%5D=>)  
613 [al\\_date\\_start%5Bvalue%5D%5Bmonth%5D=&field\\_data\\_portal\\_date\\_end%5Bvalue%5D%5B](https://fews.net/fews-data/334?tid=37&field_data_portal_date_start%5Bvalue%5D%5Byear%5D=&field_data_portal_date_start%5Bvalue%5D%5Bmonth%5D=&field_data_portal_date_end%5Bvalue%5D%5Byear%5D=&field_data_portal_date_end%5Bvalue%5D%5Bmonth%5D=>)  
614 [year%5D=&field\\_data\\_portal\\_date\\_end%5Bvalue%5D%5Bmonth%5D=>](https://fews.net/fews-data/334?tid=37&field_data_portal_date_start%5Bvalue%5D%5Byear%5D=&field_data_portal_date_start%5Bvalue%5D%5Bmonth%5D=&field_data_portal_date_end%5Bvalue%5D%5Byear%5D=&field_data_portal_date_end%5Bvalue%5D%5Bmonth%5D=>)

615 FEWS (2016), Mali Admin 1 (2016), 2D map, Viewed 19 March 2020 < [https://fews.net/fews-](https://fews.net/fews-data/334?tid=17&field_data_portal_date_start%5Bvalue%5D%5Byear%5D=&field_data_portal_date_start%5Bvalue%5D%5Bmonth%5D=&field_data_portal_date_end%5Bvalue%5D%5Byear%5D=&field_data_portal_date_end%5Bvalue%5D%5Bmonth%5D=>)  
616 [data/334?tid=17&field\\_data\\_portal\\_date\\_start%5Bvalue%5D%5Byear%5D=&field\\_data\\_portal\\_date\\_start%5Bvalue%5D%5Bmonth%5D=&field\\_data\\_portal\\_date\\_end%5Bvalue%5D%5B](https://fews.net/fews-data/334?tid=17&field_data_portal_date_start%5Bvalue%5D%5Byear%5D=&field_data_portal_date_start%5Bvalue%5D%5Bmonth%5D=&field_data_portal_date_end%5Bvalue%5D%5Byear%5D=&field_data_portal_date_end%5Bvalue%5D%5Bmonth%5D=>)  
617 [al\\_date\\_start%5Bvalue%5D%5Bmonth%5D=&field\\_data\\_portal\\_date\\_end%5Bvalue%5D%5B](https://fews.net/fews-data/334?tid=17&field_data_portal_date_start%5Bvalue%5D%5Byear%5D=&field_data_portal_date_start%5Bvalue%5D%5Bmonth%5D=&field_data_portal_date_end%5Bvalue%5D%5Byear%5D=&field_data_portal_date_end%5Bvalue%5D%5Bmonth%5D=>)  
618 [year%5D=&field\\_data\\_portal\\_date\\_end%5Bvalue%5D%5Bmonth%5D=>](https://fews.net/fews-data/334?tid=17&field_data_portal_date_start%5Bvalue%5D%5Byear%5D=&field_data_portal_date_start%5Bvalue%5D%5Bmonth%5D=&field_data_portal_date_end%5Bvalue%5D%5Byear%5D=&field_data_portal_date_end%5Bvalue%5D%5Bmonth%5D=>)

619 GADM, 2018, Spatial data by country, 2D map, Viewed 19 March 2020 <https://gadm.org/data.html>

620 Humanitarian Data Exchange (2019), Indonesia - Subnational Administrative Boundaries, 2D map,  
621 viewed 21 March 2020 <[https://data.humdata.org/dataset/indonesia-administrative-](https://data.humdata.org/dataset/indonesia-administrative-boundary-polygons-lines-and-places-levels-0-4b)  
622 [boundary-polygons-lines-and-places-levels-0-4b](https://data.humdata.org/dataset/indonesia-administrative-boundary-polygons-lines-and-places-levels-0-4b)>

623 Humanitarian Data Exchange (2018), United Republic of Tanzania - Subnational Administrative  
624 Boundaries, 2D map, Viewed 21 March 2020 [https://data.humdata.org/dataset/tanzania-](https://data.humdata.org/dataset/tanzania-administrative-boundaries-level-1-to-3-regions-districts-and-wards-with-2012-population)  
625 [administrative-boundaries-level-1-to-3-regions-districts-and-wards-with-2012-population](https://data.humdata.org/dataset/tanzania-administrative-boundaries-level-1-to-3-regions-districts-and-wards-with-2012-population)

626 IPUMS International (2020), YEAR-SPECIFIC FIRST-LEVEL GEOGRAPHY, 2D map, Viewed 21 March  
627 2020 [https://international.ipums.org/international/gis\\_yrspecific\\_1st.shtml](https://international.ipums.org/international/gis_yrspecific_1st.shtml)

628 Natural Earth, 2018, Admin 0 – Countries & Admin 1 – States, Provinces. 2D map, Viewed 19 March  
629 2020, < [https://www.naturalearthdata.com/downloads/10m-cultural-vectors/10m-admin-1-](https://www.naturalearthdata.com/downloads/10m-cultural-vectors/10m-admin-1-states-provinces/)  
630 [states-provinces/](https://www.naturalearthdata.com/downloads/10m-cultural-vectors/10m-admin-1-states-provinces/)>

631

632
